# Supplementary material for: Measuring mRNA translation in neuronal processes and somata by tRNA-FRET
Source: bioRxiv or medRxiv preprint supplement (doi:10.1101/646216), 2019-05-23

Figure 1– figure supplement 1. Levels of peIF2 $\alpha$  return to baseline 48h following application of tRNA

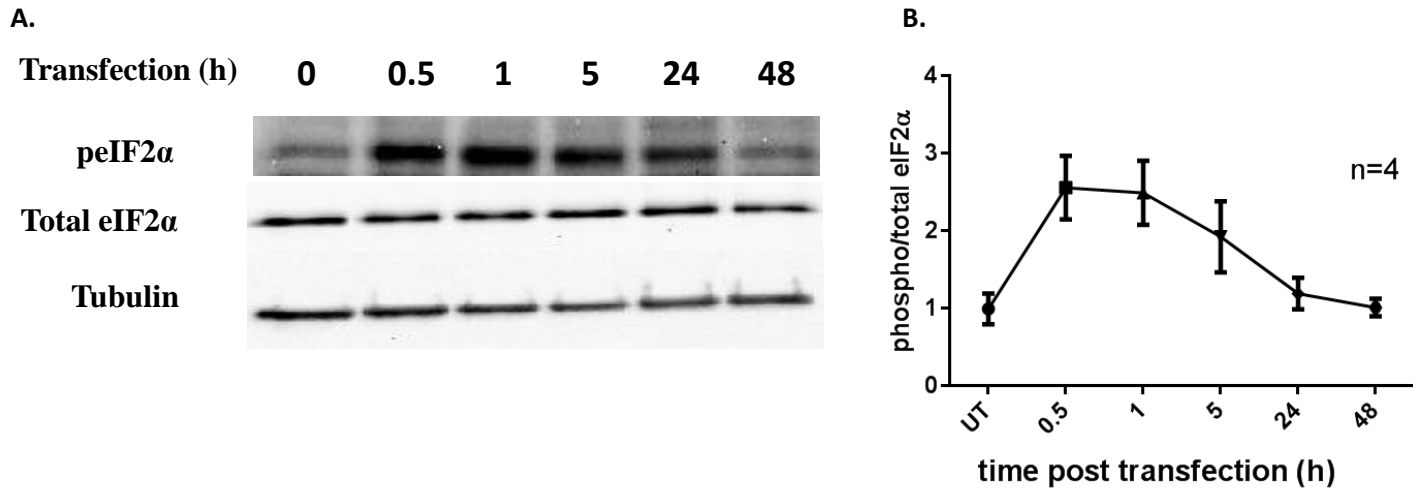

Figure 1 – figure supplement 2. Mature culture has more tRNA puncta in the soma and more condensed tRNA puncta regions (“hot spots”) in comparison to young culture.

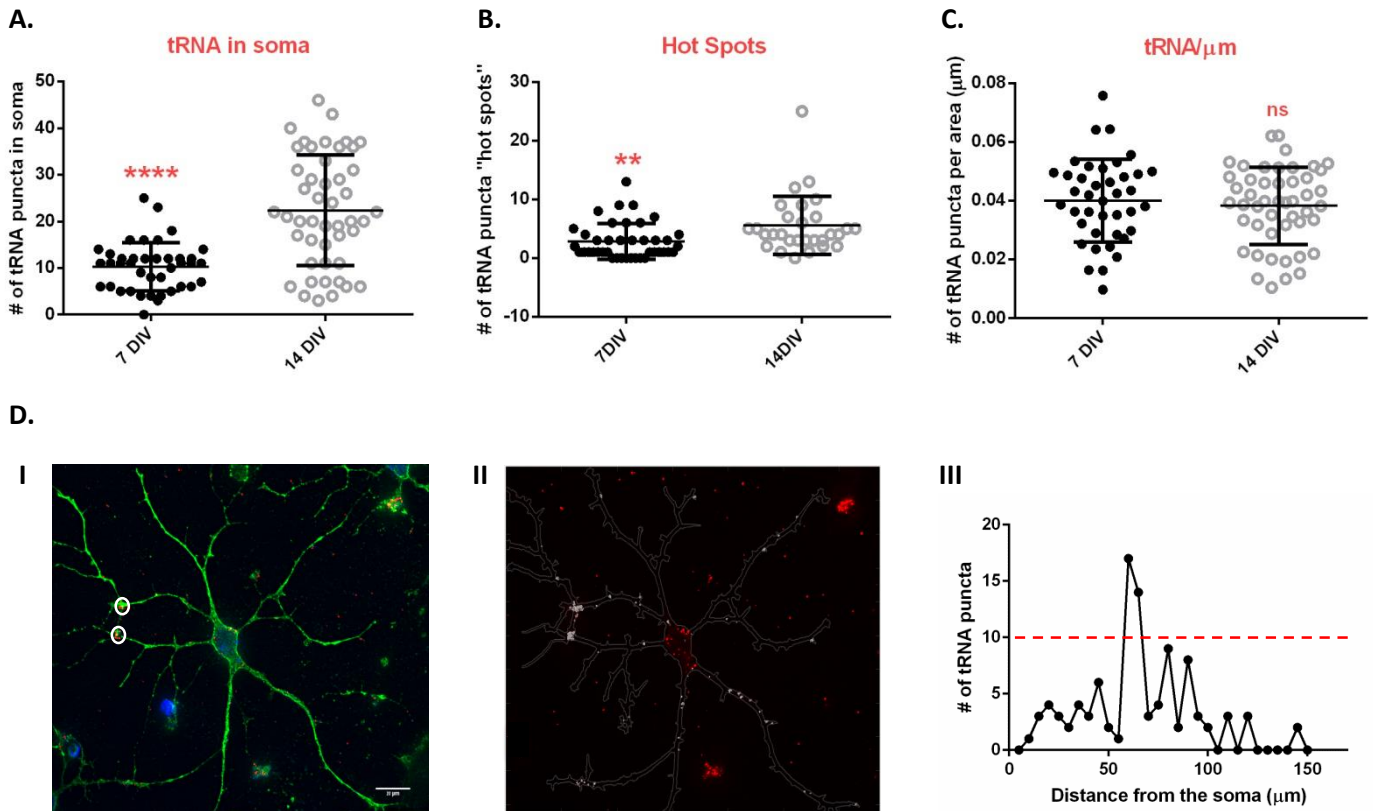

Figure 2 – figure supplement 1. Total amount of tRNA puncta remains unchanged in all measured time points

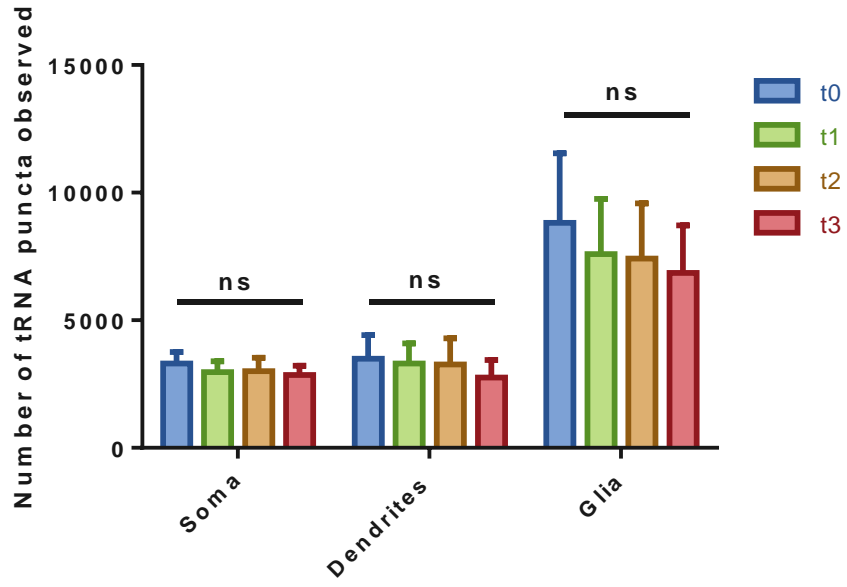

Figure 4 – figure supplement 1. Determination of the spatial resolution of dSTORM

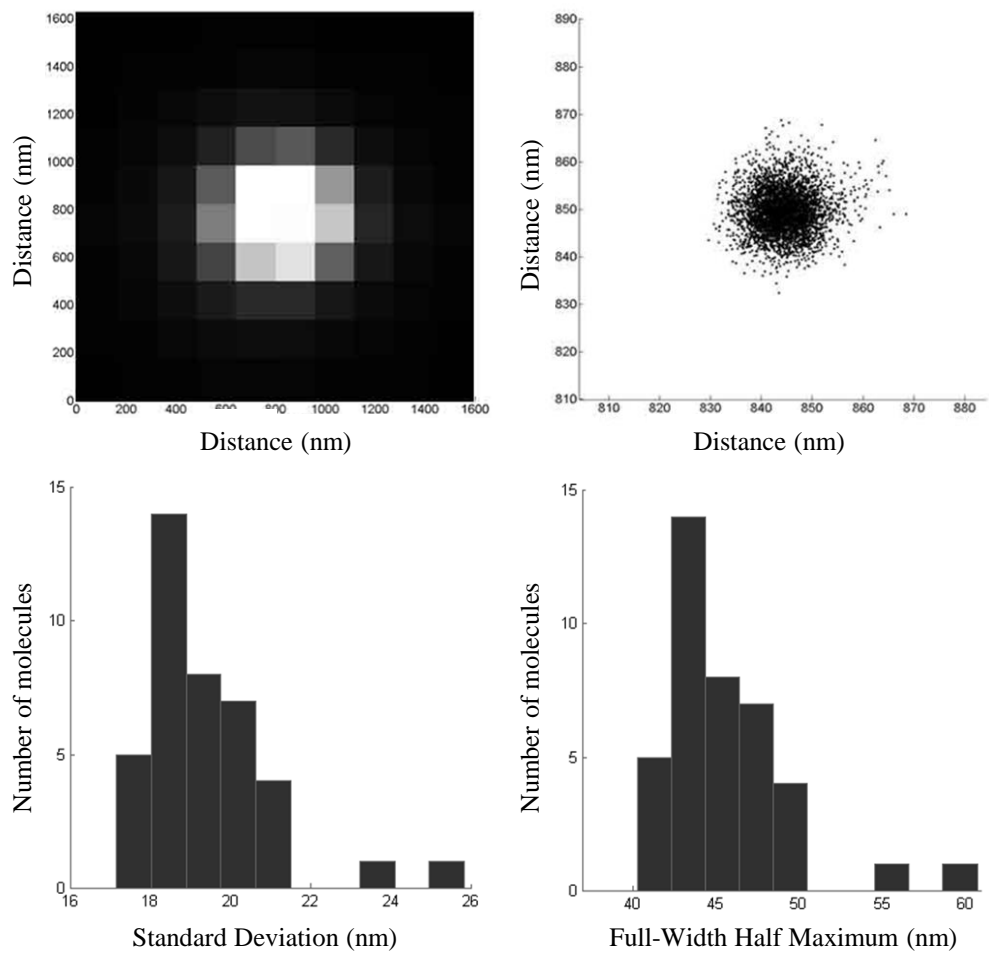

Figure 5 – figure supplement 1. Illustration of a Microfluidic chamber

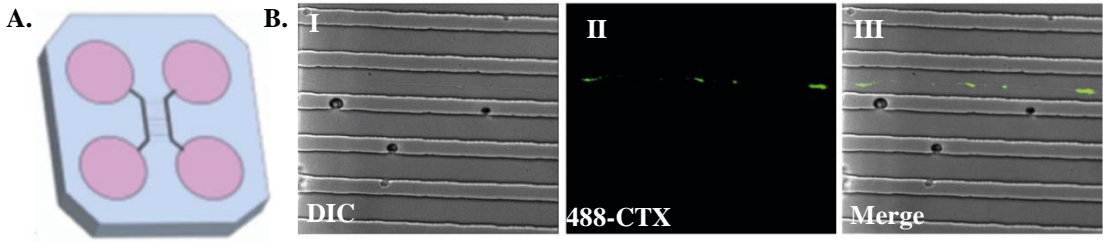

**Figure 6 – figure supplement 1. Biphasic pattern of mRNA translation up-regulation is apparent in both neuronal somata and dendrites separately**

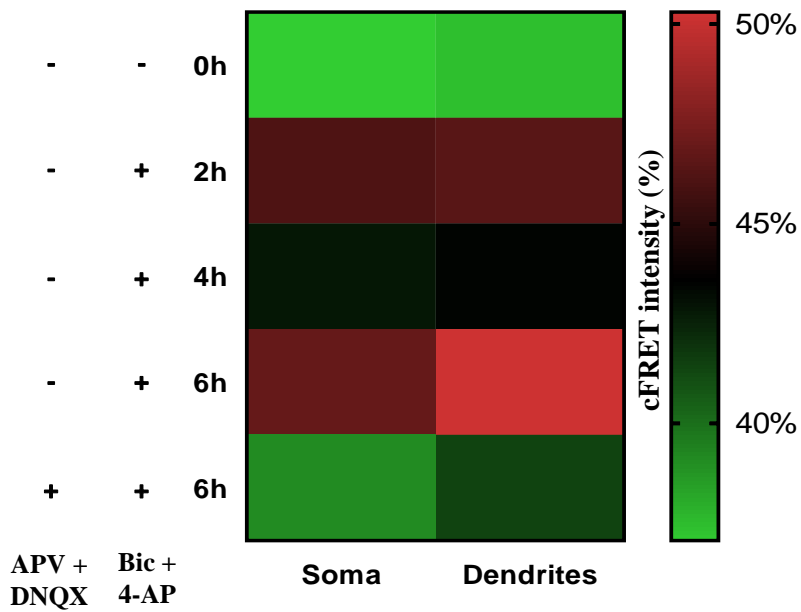

**Figure 6 – figure supplement 2. Immunocytochemical SUNSET shows mRNA translation up-regulation following cLTP**

A.

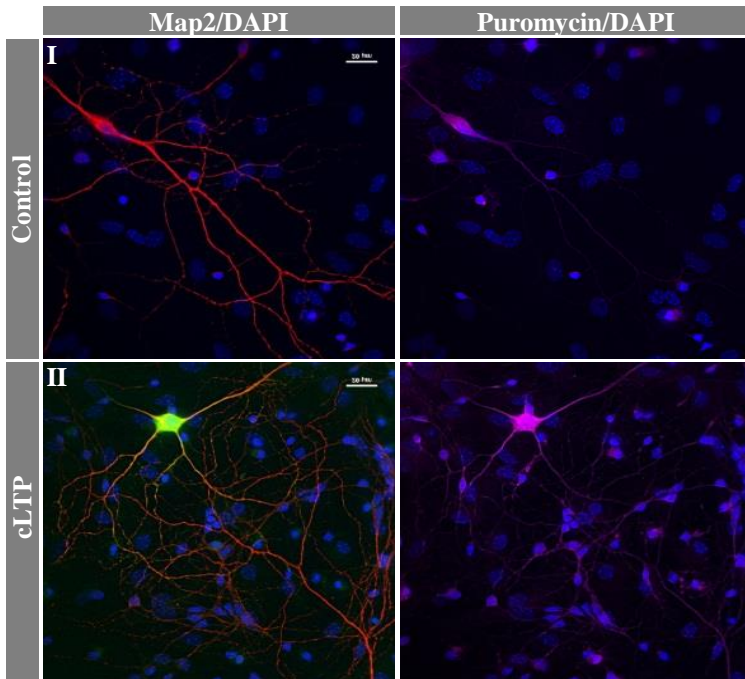

B.

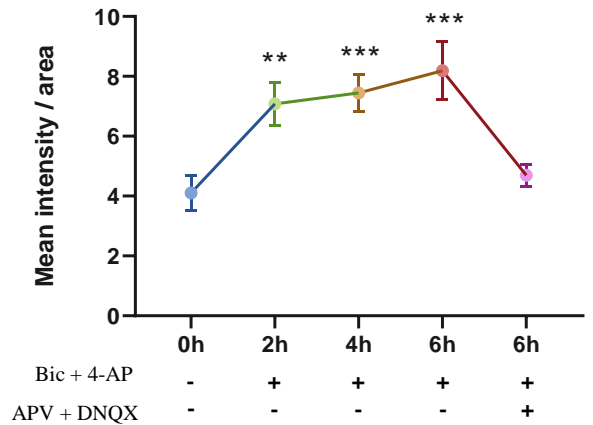

Supplement: Supplementary file [file media-1.pdf]
